# Supplementary material
Source: MDPI journal article supplement (https://www.mdpi.com/2073-4395/12/1/95)
Supplement: s1 [file s1]

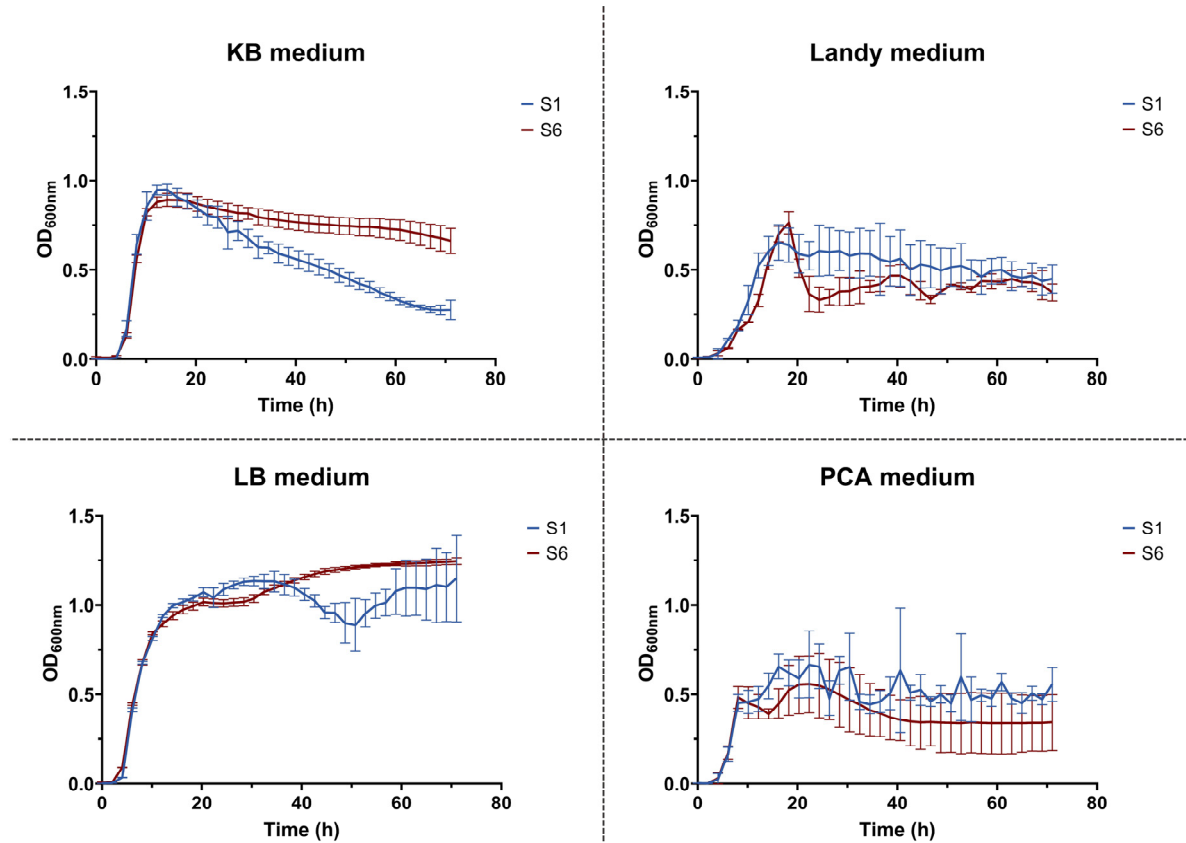

**Figure S1.** Kinetics of S1 and S6 *Bacillus velezensis* strains growth in different liquid media. These two strains were inoculated in Erlenmeyer containing one of the four different media, King's B (KB), Landy, lysogeny broth (LB), and Plate Count Agar (PCA) for three days. Bacterium growth was assessed by measuring the optical density in each well at 600 nm. Three repetitions were used for each condition. Optical density was also measured for controls (i.e., media without bacteria) and these data were used to correct optical density means presented in this figure. Bars stand for standard deviation ( $n = 3$ ).
